# Supplementary material
Source: HighWire-hosted journal article supplement (http://www.ajnr.org/highwire/filestream/76362/field_highwire_adjunct_files/0/19-01228.pdf)
Supplement: 19-01228.pdf [file 19-01228.pdf]

**On-line Table: Intra-arterial chemotherapy for retinoblastoma in infants weighing ≤10 kg (74 treated eyes with 222 IAC sessions)—tumor characteristics and treatment characteristics**

| Variable                                                                               | Weight ≤ 10 kg (n = 74 Eyes; 35.7% of 69 Patients) | Weight >10 kg (n = 133 Eyes; 64.2% of 127 Patients) | P Value | Total (n = 207) Eyes (% of 196 Patients) |
|----------------------------------------------------------------------------------------|----------------------------------------------------|-----------------------------------------------------|---------|------------------------------------------|
| Greatest basal diameter (mm), mean (median, range)                                     | 15.0 (16, 3–24)                                    | 16.0 (16, 4–24)                                     | .25     | 16 (16, 3–24)                            |
| Greatest tumor thickness (mm), mean (median, range)                                    | 7.2 (6.5, 1–17)                                    | 8.4 (8, 1–22)                                       | .04     | 8 (7.4, 1–22)                            |
| Proximity to foveola (mm), mean (median, range)                                        | 0.7 (0, 0–11)                                      | 2.4 (0, 0–15)                                       | .01     | 1.8 (0, 0–15)                            |
| Proximity to optic disc (mm), mean (median, range)                                     | 0.8 (0, 0–8)                                       | 2.0 (0, 0–18)                                       | .01     | 1.6 (0, 0–18)                            |
| Subretinal seeding (n = 207)                                                           | 30.0 (40.5)                                        | 51.0 (38.3)                                         | .75     | 81 (39.1)                                |
| Vitreous seeding (n = 207)                                                             | 18.0 (24.3)                                        | 70.0 (52.6)                                         | .01     | 88 (42.5)                                |
| Anterior chamber seeding (n = 207)                                                     | 0.0 (0)                                            | 1.0 (0.7)                                           | .45     | 1 (0.5)                                  |
| ICRB (n = 191)                                                                         |                                                    |                                                     |         |                                          |
| Group B                                                                                | 12 (16.9)                                          | 5 (4.2)                                             | .01     | 17 (8.9)                                 |
| Group C                                                                                | 9 (12.7)                                           | 6 (5.0)                                             |         | 15 (7.9)                                 |
| Group D                                                                                | 34 (47.9)                                          | 58 (48.3)                                           |         | 92 (48.2)                                |
| Group E                                                                                | 16 (22.5)                                          | 51 (42.5)                                           |         | 67 (35.1)                                |
| Treatment (n = 207)                                                                    |                                                    |                                                     |         |                                          |
| Primary                                                                                | 38.0 (51.3)                                        | 66.0 (49.6)                                         | .85     | 104 (50.2)                               |
| Secondary                                                                              | 36.0 (48.6)                                        | 67.0 (50.3)                                         |         | 103 (49.7)                               |
| Total IAC procedures (n = 658)                                                         | 222 (33.7)                                         | 436 (66.6)                                          |         |                                          |
| IAC infusions per eye (n = 658)                                                        | 3.0 (3, 1–8)                                       | 3.3 (3, 1–9)                                        | .26     | 3.2 (3, 1–9)                             |
| Technique of treatment (n = 658)                                                       |                                                    |                                                     |         |                                          |
| OAC                                                                                    | 206.0 (95.4)                                       | 397.0 (92.9)                                        | .65     | 603 (93.7)                               |
| Balloon-assisted delivery                                                              | 6.0 (2.7)                                          | 13.0 (3.0)                                          |         | 19 (2.9)                                 |
| MMA                                                                                    | 4.0 (1.9)                                          | 17.0 (3.9)                                          |         | 21 (3.2)                                 |
| Procedure duration (n = 658) (min) mean (median, range)                                | 47.5 (42, 6–156)                                   | 51.1 (48, 7–200)                                    | .06     | 49.9 (46, 6–200)                         |
| Mean contrast dose per eye (n = 195) (mL), mean (SD, 95% CI)                           | 28.4 (9.4, 26.0–30.6)                              | 30.5 (9.7, 28.8–32.7)                               | .12     | 29.8 (9.7, 28.4–31.1)                    |
| Mean fluoroscopy time per eye (n = 197) (min), mean (SD, 95% CI)                       | 7.5 (4.7, 6.4–8.6)                                 | 7.2 (7.6, 5.8–8.5)                                  | .71     | 7.3 (6.7, 6.4–8.2)                       |
| Mean radiation exposure per eye (n = 195) (mGy <sup>2</sup> ), mean (SD, 95% CI)       | 1.7 (2.6, 1.0–2.3)                                 | 2.6 (3.1, 2.0–3.1)                                  | .02     | 2.2 (3.0, 1.8–2.7)                       |
| Cumulative radiation exposure per eye (n = 195) (mGy <sup>2</sup> ), mean (SD, 95% CI) | 5.0 (8.1, 3.0–7.0)                                 | 7.7 (8.4, 6.2–9.2)                                  | .01     | 6.7 (8.4, 5.5–8.0)                       |
| Aborted procedures (n = 658)                                                           | 12 (5.4)                                           | 7 (1.6)                                             | .01     | 19 (2.8)                                 |
| Groin access                                                                           | 6.0 (2.7)                                          | 0.0 (0.0)                                           |         | 6 (0.9)                                  |
| Atretic OA                                                                             | 1.0 (0.5)                                          | 0.0 (0.0)                                           |         | 1 (0.2)                                  |
| Vasospasm                                                                              | 2.0 (0.9)                                          | 0.0 (0.0)                                           |         | 2 (0.3)                                  |
| OA thrombosis                                                                          | 3.0 (1.4)                                          | 5.0 (1.1)                                           |         | 8 (1.2)                                  |
| Dissection                                                                             | 0.0 (0.0)                                          | 1.0 (0.2)                                           |         | 1 (0.2)                                  |
| Anaphylaxis                                                                            | 0.0 (0.0)                                          | 1.0 (0.2)                                           |         | 1 (0.2)                                  |
| Periprocedural complications (n = 658)                                                 | 2 (0.9)                                            | 2 (0.5)                                             | .49     | 4 (0.6)                                  |

**Note:**—OAC indicates ophthalmic artery catheterization; MMA, middle meningeal artery.
